# Supplementary material for: Relative Risk of Death in Bulgarian Cancer Patients during the Initial Waves of the COVID-19 Pandemic
Source: MDPI journal article supplement (doi:10.3390/healthcare11182594), 2023-09-20

**Figure S1.** Quantile–quantile (Q–Q) plot of the residuals from the linear regression model of relative risk of death for all cancer patients group. The  $p$ -value = 0.4125 is from the Shapiro-Wilk test suggesting no evidence to reject the null hypothesis for normal distribution of the error terms in the model.

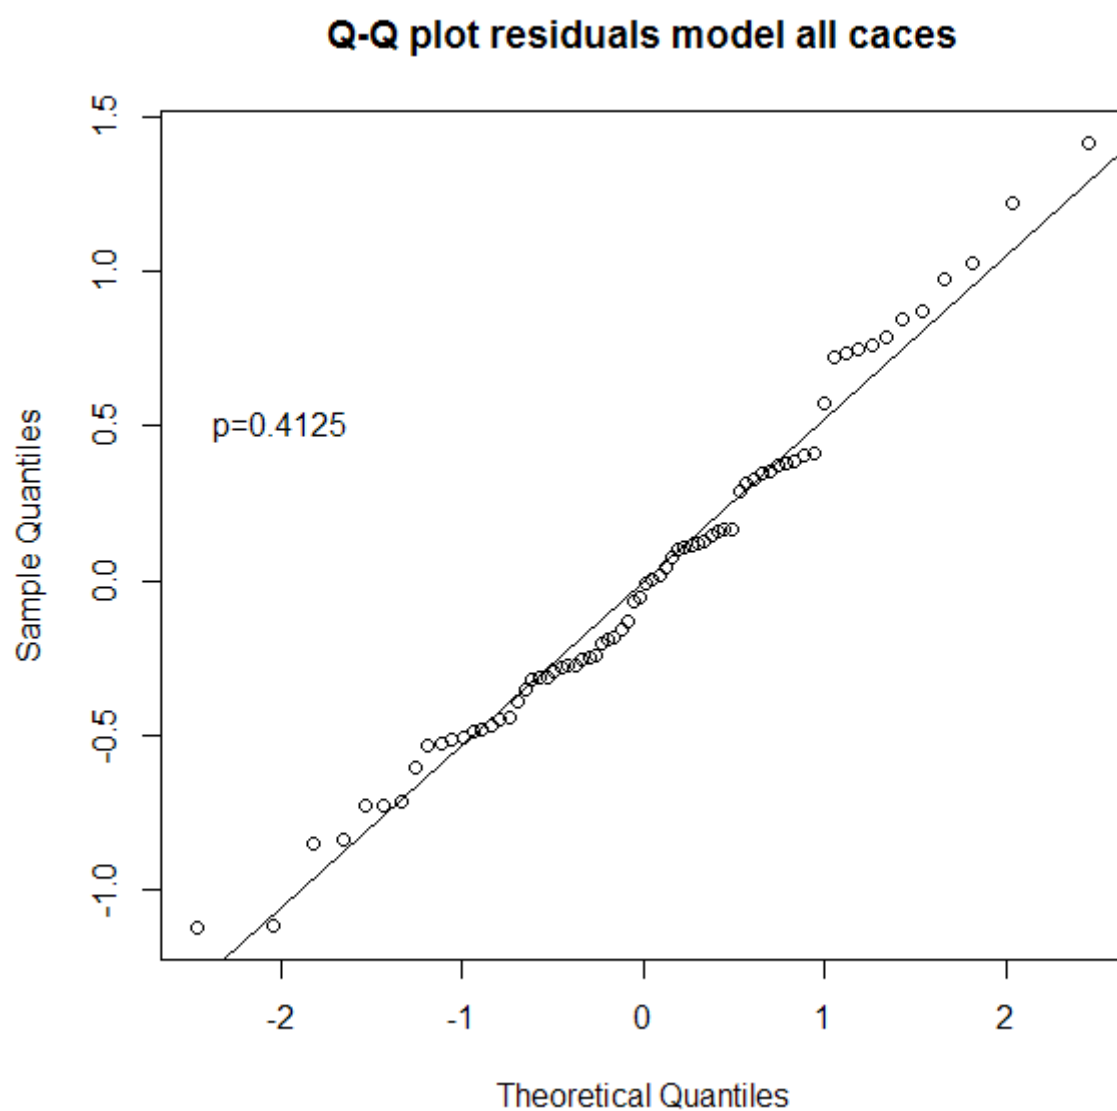

Supplement: s1 [file s1]
